# Supplementary material
Source: publisher figshare collection journal article supplement (https://acs.figshare.com/ndownloader/files/10615756)
Supplement: Supplementary file 1 [file 10615756]

**Supporting information**

**Integrated CO<sub>2</sub> Capture and Conversion as an Efficient Process  
for Fuels from Greenhouse Gases**

Sung Min Kim,<sup>†</sup> Paula M. Abdala,<sup>†</sup> Marcin Broda,<sup>†</sup> Davood Hosseini,<sup>†</sup>  
Christophe Copéret,<sup>‡</sup> and Christoph Müller<sup>\*,†</sup>

<sup>†</sup>Department of Mechanical and Process Engineering, ETH Zürich, Leonhardstrasse 21, 8092 Zürich, Switzerland

<sup>‡</sup>Department of Chemistry and Applied Sciences, ETH Zürich, Vladimir Prelog Weg 1-5, 8093 Zürich, Switzerland

correspondence to: muelchri@ethz.ch (Prof. Christoph Müller)

## Content

|                                                                                                                                                                                                                                                              |    |
|--------------------------------------------------------------------------------------------------------------------------------------------------------------------------------------------------------------------------------------------------------------|----|
| <b>Supplementary Text</b> .....                                                                                                                                                                                                                              | 3  |
| <b>Table S1.</b> Physicochemical properties of reacted Ni/MgO-Al <sub>2</sub> O <sub>3</sub> DRM catalyst.....                                                                                                                                               | 4  |
| <b>Figures</b> .....                                                                                                                                                                                                                                         | 5  |
| <b>Figure S1.</b> Schematic diagram of a conventional calcium looping based CO <sub>2</sub> capture process.....                                                                                                                                             | 5  |
| <b>Figure S2.</b> Schematic diagram of the fluidized bed setup. ....                                                                                                                                                                                         | 5  |
| <b>Figure S3.</b> H <sub>2</sub> -TPR profile of Ni/MgO-Al <sub>2</sub> O <sub>3</sub> .....                                                                                                                                                                 | 6  |
| <b>Figure S4.</b> Characterization of the reacted DRM catalyst: (a) X-ray powder diffraction patterns: (△) periclase (MgO), (◇) Ni, and (×) graphite. (b) Raman spectra and TEM of the reacted DRM catalyst after (c) the 1st and (d) the 10th cycle. ....   | 7  |
| <b>Figure S5.</b> (a) CH <sub>4</sub> and CO <sub>2</sub> conversion and (b) yield of H <sub>2</sub> and CO, and H <sub>2</sub> /CO ratio in the pre-breakthrough stage as a function of the cycle number. ....                                              | 8  |
| <b>Figure S6.</b> Molar flow rate of H <sub>2</sub> and CO during CO <sub>2</sub> conversion (DRM) and subsequent CO <sub>2</sub> capture at different cycle numbers: (—) 1 <sup>st</sup> , (- - -) 5 <sup>th</sup> and (- · -) 10 <sup>th</sup> cycle ..... | 8  |
| <b>Figure S7.</b> Characterization of the reacted CO <sub>2</sub> sorbent: HR-SEM images of (a) reacted limestone after the 10 <sup>th</sup> cycle (calcined form), and (b) BJH pore size distribution of the freshly calcined and reacted limestone. ....   | 9  |
| <b>Figure S8.</b> (a) CO <sub>2</sub> release profile for 3 g of limestone at 900 °C and (b) regeneration of limestone coupled with DRM reaction at 900 °C. ....                                                                                             | 9  |
| <b>Figure S9.</b> N <sub>2</sub> physisorption isotherms of calcined limestone and reduced Ni/MgO-Al <sub>2</sub> O <sub>3</sub> . ..                                                                                                                        | 10 |
| <b>References</b> .....                                                                                                                                                                                                                                      | 10 |

## Supplementary Text

### Material characterization

Due to the hygroscopic nature of the material,  $\text{Ca}(\text{OH})_2$  is also observed in the XRD patterns of the material after calcination (FigureS2e).  $\text{N}_2$  physisorption measurements (FigureS9) reveal that calcined limestone has a macro-porous morphology with a type III isotherm and  $\text{H}_3$  type hysteresis loop (IUPAC classification <sup>1</sup>), a BET surface area of  $16 \text{ m}^2/\text{g}_{\text{sorbent}}$  and a BJH pore volume and pore diameter of  $0.13 \text{ cm}^3/\text{g}_{\text{sorbent}}$  and  $38.2 \text{ nm}$ , respectively.

Turning to the dry reforming catalyst, after reduction at  $800^\circ\text{C}$  (the reduction temperature was determined by  $\text{H}_2$ -TPR experiments, FigureS2),  $\text{Ni}/\text{MgO}-\text{Al}_2\text{O}_3$  (FigureS2e) contains metallic nickel and periclase phases ( $\text{MgO}-\text{Al}_2\text{O}_3$ ). The XRD data shows that the  $d(200)$  spacing of periclase in reduced DRM catalyst ( $2.093 \text{ \AA}$ ) is smaller than that of the pure periclase reference,  $\text{MgO}$ , ( $2.102 \text{ \AA}$ ), indicative that  $\text{Al}^{3+}$  cations are incorporated into the periclase structure <sup>2</sup>.  $\text{N}_2$  physisorption measurements show a type IV isotherm and a  $\text{H}_2$  type hysteresis loop, indicating a mesoporous morphology (BET surface area and BJH pore volume was equal to  $163 \text{ m}^2/\text{g}_{\text{catalyst}}$  and  $0.91 \text{ cm}^3/\text{g}_{\text{catalyst}}$ , respectively). Using  $\text{H}_2$  chemisorption, a Ni surface area of  $10.3 \text{ m}^2\cdot\text{g}_{\text{cat}}^{-1}$  is determined.

### Cyclic $\text{CO}_2$ capture performance of limestone-derived $\text{CaO}$ as determined in a TGA

To rationalize the cyclic  $\text{CO}_2$  capture capacity measured in the fluidized bed (Figure4b), the cyclic  $\text{CO}_2$  uptake of limestone-derived  $\text{CaO}$  is also evaluated in a TGA at  $720^\circ\text{C}$ . Although there are appreciable difference between a TGA and a fluidized bed e.g. with regards to mass transfer characteristics, we find that  $\text{CO}_2$  capacity of limestone-derived  $\text{CaO}$  as determined in a TGA is comparable to the results obtained in a fluidized bed. This observation indicates that for the given number of cycles, attrition is a minor contributor to the decreasing  $\text{CO}_2$  uptake of limestone.

### Regeneration of $\text{CaCO}_3$ coupled with DRM at $900^\circ\text{C}$

We tests the regeneration of  $\text{CaCO}_3$  under pure  $\text{CH}_4$  stream at  $900^\circ\text{C}$  after  $\text{CO}_2$  capture at  $720^\circ\text{C}$ .  $3 \text{ g}$  of pre-calcined limestone is used to avoid complete calcination of  $\text{CaCO}_3$  before reaching at  $900^\circ\text{C}$ . The  $\text{CO}_2$  molar fraction was reached to  $0.49$  under  $\text{N}_2$  ( $0.2 \text{ L/min}$ ) at  $900^\circ\text{C}$ , albeit very short ( $\approx 3 \text{ min}$ ) due to limited quantity of  $\text{CaCO}_3$  (FigureS8a). The coupled  $\text{CO}_2$  capture and conversion reactions at  $900^\circ\text{C}$  using a mixture of  $3.0 \text{ g}$  limestone and  $3.0 \text{ g}$   $\text{Ni}/\text{MgO}-\text{Al}_2\text{O}_3$  is performed (FigureS8b) under pure  $\text{CH}_4$  ( $0.2 \text{ L/min}$ ).  $\text{H}_2$  mole fraction is prominently high due to  $\text{CH}_4$  decomposition ( $t = 25 - 31 \text{ min}$ ), where  $\text{CO}_2$  released from  $\text{CaCO}_3$  is completely converted  $\text{CO}$  and  $\text{CO}$  mole fraction was gradually increased in accordance with  $\text{CO}_2$  release profile of  $\text{CaCO}_3$  depending on temperature. Only  $\text{H}_2$  and  $\text{CO}$  with  $1.04$  of  $\text{H}_2/\text{CO}$  molar ratio is observed in pre-breakthrough at  $900^\circ\text{C}$  ( $t = 30 - 33 \text{ min}$ ), indicative of full conversion of the  $\text{CO}_2$  released

via the dry reforming of methane into a synthesis. In breakthrough, CO mole fraction is steadily reduced due to the quantity of CO<sub>2</sub> released decreased, whereas H<sub>2</sub> mole fraction is increased due to CH<sub>4</sub> decomposition. In the post-breakthrough stage (t > 35 min), the concentration of CH<sub>4</sub> increases due to catalyst poisoning by carbon deposition and the depletion of CaCO<sub>3</sub>.

**Table S1.** Physicochemical properties of reacted Ni/MgO-Al<sub>2</sub>O<sub>3</sub> DRM catalyst

| Catalyst                           | H <sub>2</sub> chemisorption                                           | N <sub>2</sub> physisorption <sup>b</sup>               |                                                        |                        |
|------------------------------------|------------------------------------------------------------------------|---------------------------------------------------------|--------------------------------------------------------|------------------------|
|                                    | Ni active site <sup>a</sup><br>[μmol <sub>Ni</sub> /g <sub>cat</sub> ] | S <sub>BET</sub><br>[m <sup>2</sup> /g <sub>cat</sub> ] | V <sub>p</sub><br>[cm <sup>3</sup> /g <sub>cat</sub> ] | D <sub>p</sub><br>[nm] |
| Freshly reduced                    | 262                                                                    | 163                                                     | 0.91                                                   | 5.2                    |
| 1 <sup>st</sup> post-breakthrough  | 10                                                                     | 142                                                     | 0.75                                                   | 5.9                    |
| 2 <sup>nd</sup> carbonation        | 255                                                                    | 158                                                     | 0.88                                                   | 5.7                    |
| 10 <sup>th</sup> carbonation       | 210                                                                    | 155                                                     | 0.87                                                   | 5.9                    |
| 10 <sup>th</sup> post-breakthrough | 8                                                                      | 133                                                     | 0.72                                                   | 5.9                    |

<sup>a</sup> Ni active sites quantified by H<sub>2</sub> chemisorption using a stoichiometry factor of H/Ni = 1.0. <sup>b</sup>The specific surface area, pore volume, and pore radius were calculated using BET and BJH models.

# Figures

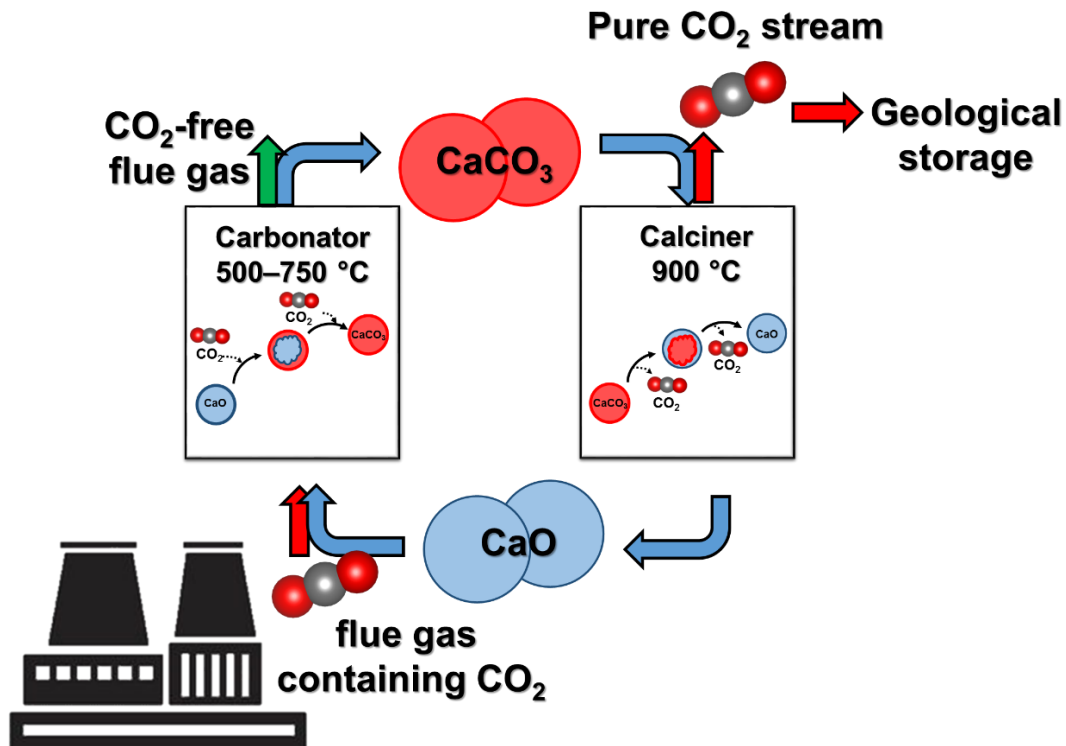

**Figure S1.** Schematic diagram of a conventional calcium looping based CO<sub>2</sub> capture process.

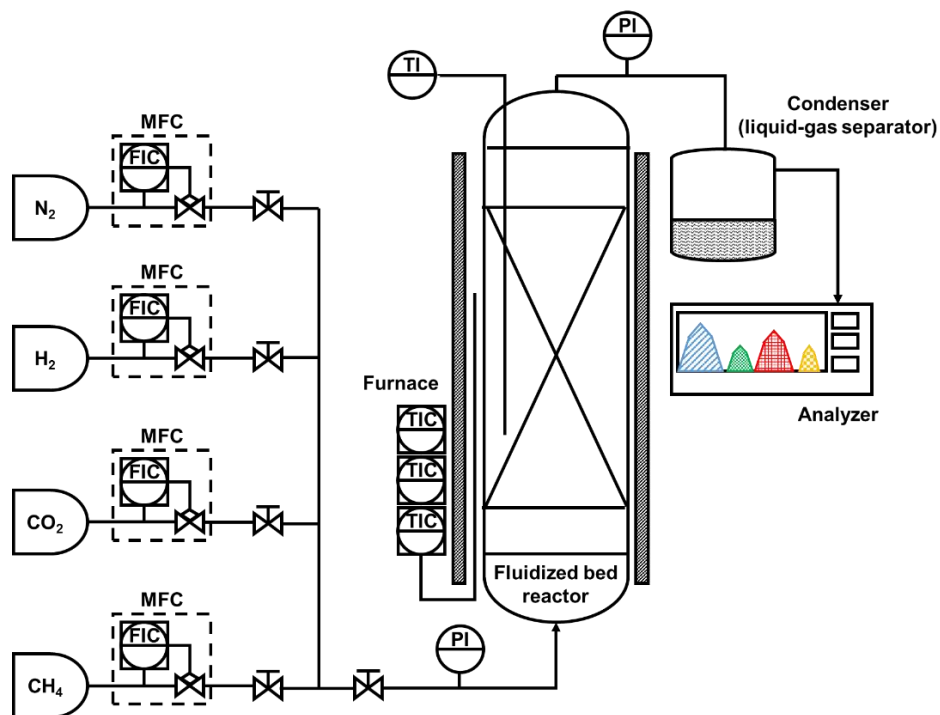

**Figure S2.** Schematic diagram of the fluidized bed setup.

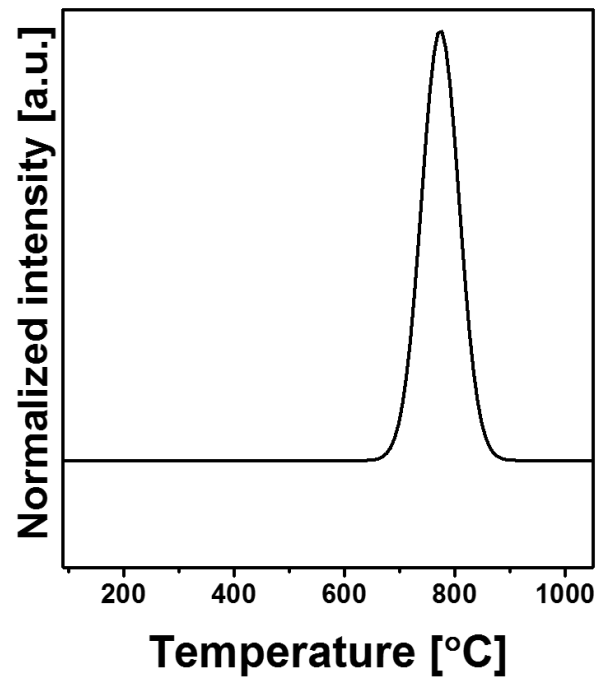

**Figure S3.** H<sub>2</sub>-TPR profile of Ni/MgO-Al<sub>2</sub>O<sub>3</sub>

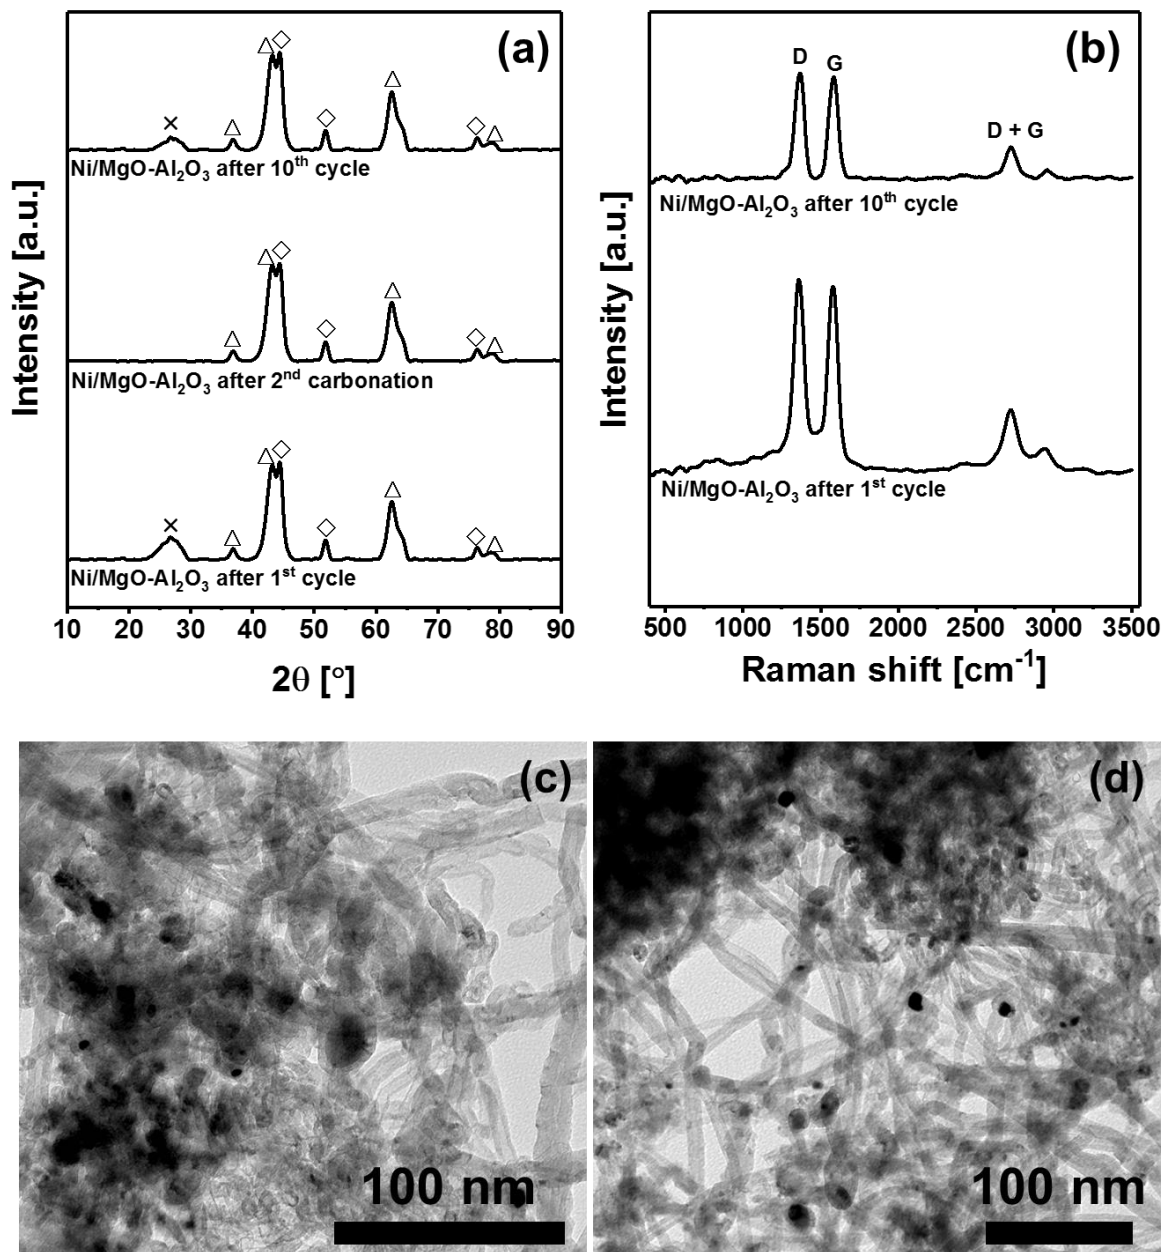

**Figure S4.** Characterization of the reacted DRM catalyst: (a) X-ray powder diffraction patterns: ( $\Delta$ ) periclase (MgO), ( $\diamond$ ) Ni, and ( $\times$ ) graphite. (b) Raman spectra and TEM of the reacted DRM catalyst after (c) the 1<sup>st</sup> and (d) the 10<sup>th</sup> cycle.

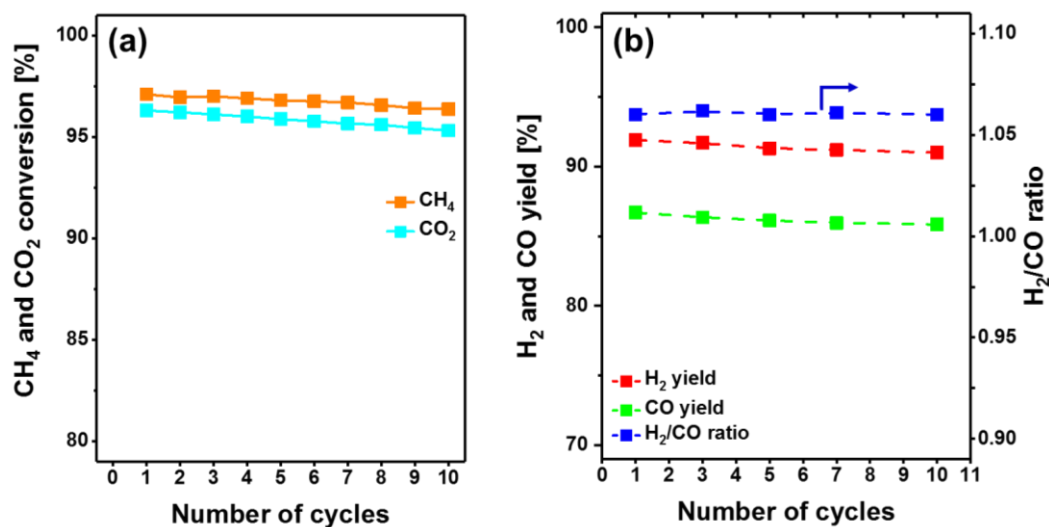

Figure S5. (a)  $\text{CH}_4$  and  $\text{CO}_2$  conversion and (b) yield of  $\text{H}_2$  and  $\text{CO}$ , and  $\text{H}_2/\text{CO}$  ratio in the pre-breakthrough stage as a function of the cycle number.

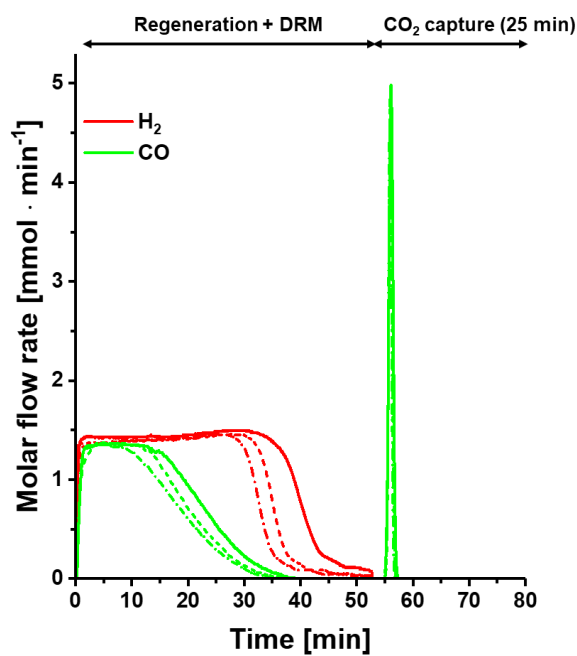

Figure S6. Molar flow rate of  $\text{H}_2$  and  $\text{CO}$  during  $\text{CO}_2$  conversion (DRM) and subsequent  $\text{CO}_2$  capture at different cycle numbers: (—) 1<sup>st</sup>, (- - -) 5<sup>th</sup> and (- · -) 10<sup>th</sup> cycle



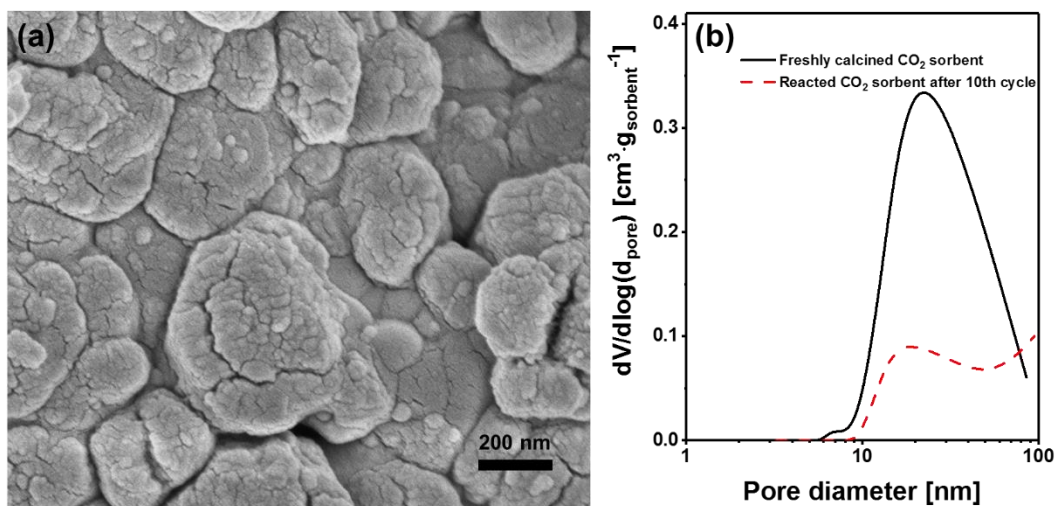

**Figure S7.** Characterization of the reacted CO<sub>2</sub> sorbent: HR-SEM images of (a) reacted limestone after the 10<sup>th</sup> cycle (calcined form), and (b) BJH pore size distribution of the freshly calcined and reacted limestone.

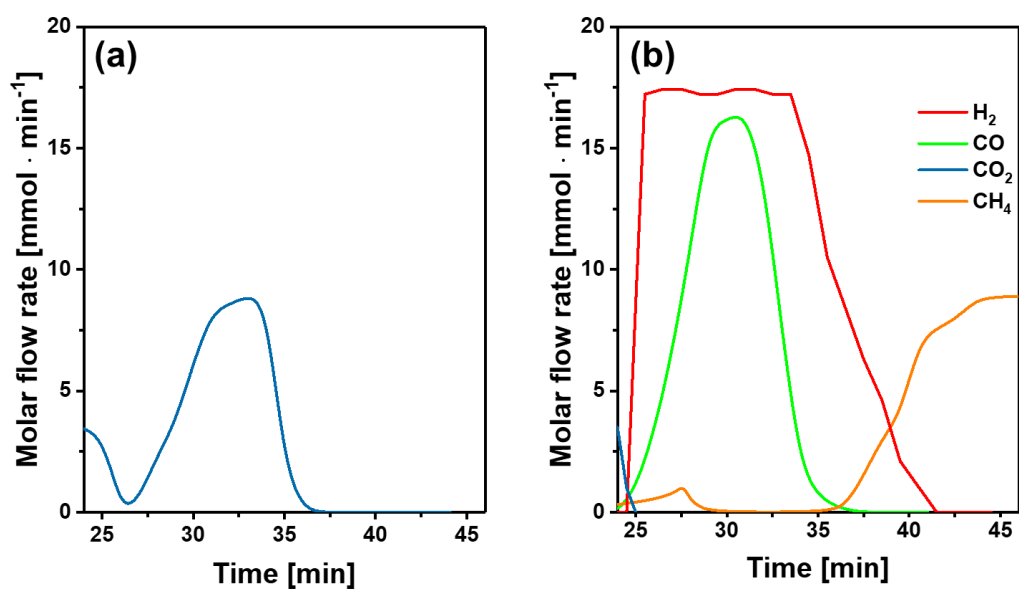

**Figure S8.** (a) CO<sub>2</sub> release profile for 3 g of limestone at 900 °C and (b) regeneration of limestone coupled with DRM reaction at 900 °C.

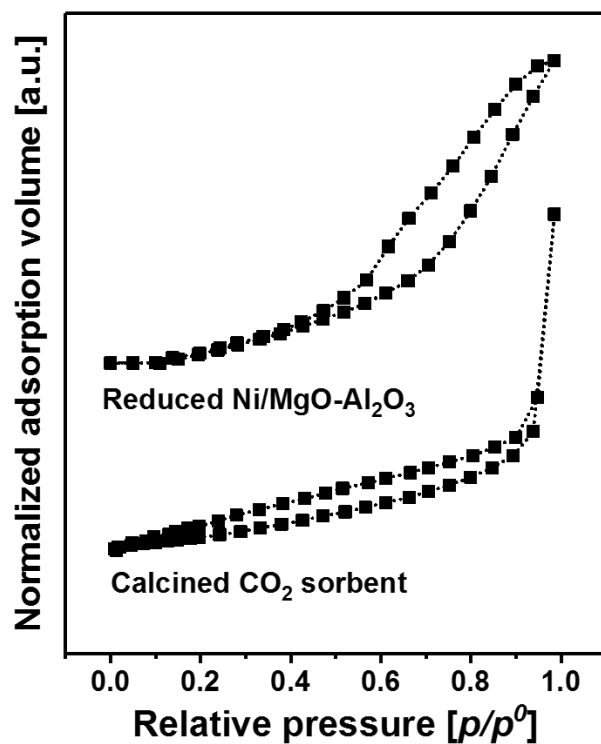

**Figure S9.** N<sub>2</sub> physisorption isotherms of calcined limestone and reduced Ni/MgO-Al<sub>2</sub>O<sub>3</sub>.

#### References

- (1) Thommes, M.; Kaneko, K.; Neimark, A. V.; Olivier, J. P.; Rodriguez-Reinoso, F.; Rouquerol, J.; Sing, K. S., *Pure Appl. Chem.* **2015**, *87*, 1051-1069.
- (2) Prescott, H. A.; Li, Z.-J.; Kemnitz, E.; Trunschke, A.; Deutsch, J.; Lieske, H.; Auroux, A., *J. Catal.* **2005**, *234*, 119-130.
